# Supplementary material for: Wrinkle facilitated hydrogen evolution reaction of vacancy-defected transition metal dichalcogenide monolayers
Source: Royal Society of Chemistry journal article supplement (doi:10.1039/d1nr06417g), 2021-01-01
Supplement: d1nr06417g1.pdf [file d1nr06417g1.pdf]

## Supporting Information

### **Wrinkle facilitated hydrogen evolution reaction of vacancy-defected transition metal dichalcogenide monolayers**

Mingjie Pu, Yufeng Guo\* and Wanlin Guo#

*State Key Laboratory of Mechanics and Control of Mechanical Structures and MOE Key Laboratory for Intelligent Nano Materials and Devices, College of Aerospace Engineering, Nanjing University of Aeronautics and Astronautics, Nanjing, 210016, China.*

#### **Corresponding Authors**

\*E-mail: [yfguo@nuaa.edu.cn](mailto:yfguo@nuaa.edu.cn)

# E-mail: [wlguo@nuaa.edu.cn](mailto:wlguo@nuaa.edu.cn)

**Table S1.** The hydrogen adsorption Gibbs free energies  $\Delta G_H$  of MoS<sub>2</sub> monolayers wrinkling along different directions, where a H atom adsorbs at the convex or concave part.

| $\Delta G_H$ (eV) | Perfect-convex | Perfect-concave | V1-convex | V1-concave |
|-------------------|----------------|-----------------|-----------|------------|
| Armchair          | 1.901          | 2.191           | 0.089     | 0.316      |
| Zigzag            | 1.822          | 2.116           | 0.069     | 0.291      |

From Table S1, it is found that the hydrogen adsorption Gibbs free energy  $\Delta G_H$  of wrinkling along zigzag direction is lower than that along armchair direction, hence only the wrinkles formed along the zigzag direction were considered in our work.

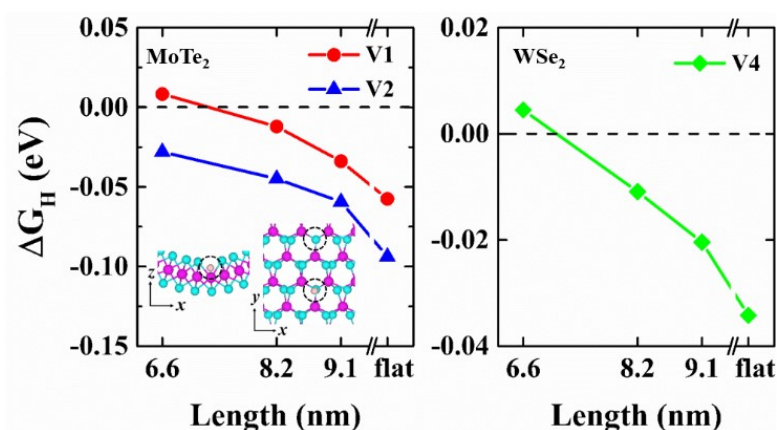

**Figure S1.** The hydrogen adsorption Gibbs free energies  $\Delta G_H$  of wrinkled MoTe<sub>2</sub> and WSe<sub>2</sub> with vacancies formed at the concave parts under different wrinkle lengths. The inset shows the absorption site of a H atom at the concave part of MoTe<sub>2</sub>.

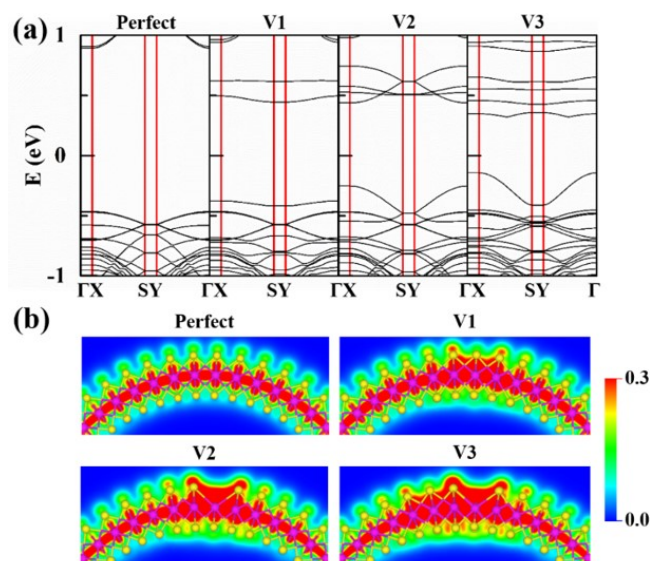

**Figure S2.** (a) Band structures of perfect and defected MoS<sub>2</sub> wrinkles with a length of 6.6 nm. (b) 2D projections of the partial charge densities (in units of  $e \cdot \text{\AA}^{-3}$ ) of the energy bands within the energy range from -1.0 eV to 1.0 eV for MoS<sub>2</sub> wrinkles. The Fermi level is set to be zero.

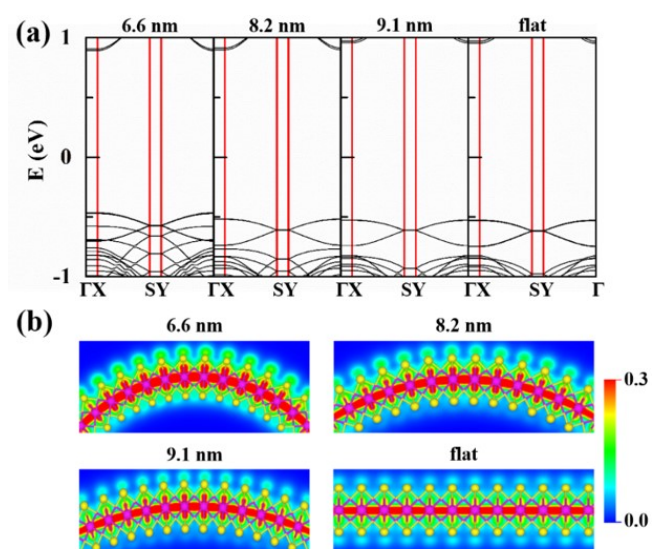

**Figure S3.** (a) Band structures of flat and wrinkled MoS<sub>2</sub> without defect. (b) 2D projections of the partial charge densities (in units of  $e \cdot \text{\AA}^{-3}$ ) of the energy bands within the energy range from -1.0 eV to 1.0 eV. The Fermi level is set to be zero.

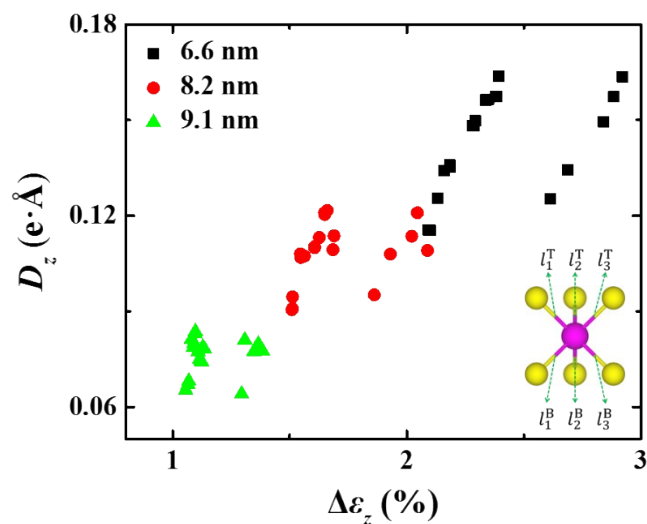

**Figure S4.** The  $z$ -direction dipole moments  $D_z$  of Mo atoms with strain gradient for perfect  $\text{MoS}_2$  wrinkles with different wrinkle lengths. The inset shows the definition of Mo-S bonds on the top and bottom surfaces.

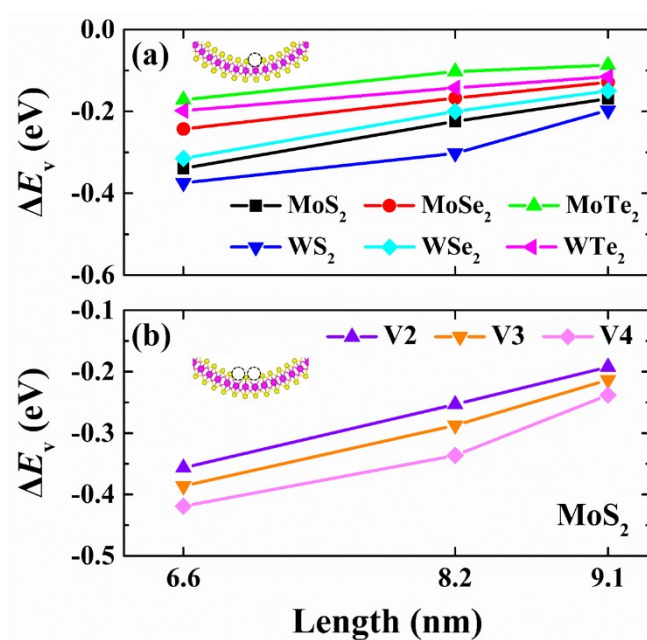

**Figure S5.** The vacancy formation energy differences  $\Delta E_v$  of (a) wrinkled TMD  $\text{MX}_2$  monolayers with one X-vacancy defect and (b) wrinkled  $\text{MoS}_2$  monolayers with multiple vacancies formed at the concave parts under different wrinkle lengths. The insets show the vacancy locations.

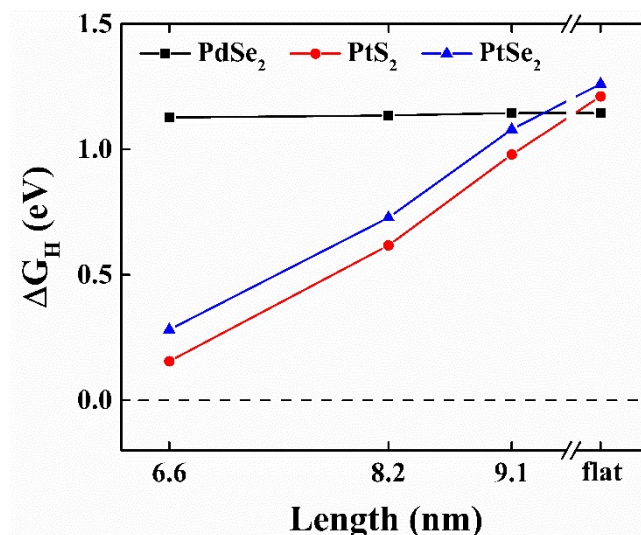

**Figure S6.** The hydrogen adsorption Gibbs free energies  $\Delta G_{\text{H}}$  of monolayer PdSe<sub>2</sub>, PtS<sub>2</sub> and PtSe<sub>2</sub> without defect under different wrinkle lengths.

The effect of wrinkling deformation on the hydrogen adsorption Gibbs free energies  $\Delta G_{\text{H}}$  of monolayer PdSe<sub>2</sub>, PtSe<sub>2</sub>, PtS<sub>2</sub> without defect has been studied using the same method and procedure. As shown in Figure S6, the hydrogen adsorption Gibbs free energies of monolayer PtSe<sub>2</sub> and PtS<sub>2</sub> decrease with decreasing the wrinkle lengths, meaning that the HER of PtS<sub>2</sub> and PtSe<sub>2</sub> can be significantly improved by wrinkle engineering. However,  $\Delta G_{\text{H}}$  of monolayer PdSe<sub>2</sub> is slightly affected by wrinkling deformation. When one vacancy defect is introduced in flat PdSe<sub>2</sub>,  $\Delta G_{\text{H}}$  decreases to 0.2657 eV. The combination of wrinkle engineering and defect engineering could be an effective way to improve the HER ability.
